# Supplementary material for: Are Causal Statements Reported in Pharmacovigilance Disproportionality Analyses Using Individual Case Safety Reports Exaggerated in Related Citations? A Meta-epidemiological Study
Source: Springer Nature journal article supplement (doi:10.1007/s40264-025-01524-x), 2025-02-22
Supplement: MOESM1 [file 40264_2025_1524_MOESM1_ESM.pdf]

**Are causal statements reported in pharmacovigilance disproportionality analyses using individual case safety reports exaggerated in related citations? A meta-epidemiological study**

Claire Bernardeau, Bruno Revol, Francesco Salvo, Michele Fusaroli, Emanuel Raschi, Jean-Luc Cracowski, Matthieu Roustit, Charles Khouri

Supplementary material

**Table of content**

|                                                                                                                                                                                                                                                      |   |
|------------------------------------------------------------------------------------------------------------------------------------------------------------------------------------------------------------------------------------------------------|---|
| <b>Supplementary Table 1.</b> Characteristics of included source studies on March 2022 .....                                                                                                                                                         | 2 |
| <b>Supplementary Table 2.</b> Characteristics of source articles according to level of causal statements in titles.....                                                                                                                              | 4 |
| <b>Supplementary Table 3.</b> Results of the multinomial model exploring the association between the level of causal statements in citations (dependent variable) and the level of causal statements in abstract conclusions of source articles..... | 5 |
| <b>Supplementary Table 4.</b> Results of the multinomial model exploring the association between the level of causal statements in citations (dependent variable) and the level of causal statements in titles of source articles. ....              | 6 |

**Supplementary Table 1.** Characteristics of included source studies on March 2022

| Article | Altmetric Attention Score | Number of citation | Journal type    | Journal Impact factor at publication date | Year of publication | Last author gender | Level of causal statements in Title | Level of causal statements in conclusion | Clinical recommendations | Description of limitations |
|---------|---------------------------|--------------------|-----------------|-------------------------------------------|---------------------|--------------------|-------------------------------------|------------------------------------------|--------------------------|----------------------------|
| 1       | 3742                      | 34                 | Clinical        | 13.310                                    | 2021                | M                  | 1                                   | 1                                        | 0                        | 0                          |
| 2       | 1201                      | 15                 | Pharmacological | 6.889                                     | 2020                | M                  | 1                                   | 1                                        | 1                        | 0                          |
| 3       | 712                       | 9                  | Clinical        | 4.380                                     | 2020                | M                  | 4                                   | 2                                        | 0                        | 0                          |
| 4       | 725                       | 5                  | Clinical        | 7.064                                     | 2021                | M                  | 2                                   | 1                                        | 0                        | 0                          |
| 5       | 111                       | 38                 | Clinical        | 1.696                                     | 2014                | M                  | 4                                   | 4                                        | 0                        | 0                          |
| 6       | 492                       | 67                 | Pharmacological | 3.435                                     | 2016                | M                  | 1                                   | 1                                        | 0                        | 1                          |
| 7       | 389                       | 35                 | Pharmacological | NI                                        | 2017                | M                  | 4                                   | 2                                        | 0                        | 0                          |
| 8       | 336                       | 20                 | Clinical        | 5.359                                     | 2019                | F                  | 3                                   | 2                                        | 0                        | 0                          |
| 9       | 329                       | 43                 | Clinical        | 44.424                                    | 2021                | M                  | 1                                   | 1                                        | 0                        | 0                          |
| 10      | 329                       | 15                 | Pharmacological | 4.340                                     | 2020                | M                  | 2                                   | 2                                        | 1                        | 0                          |
| 11      | 314                       | 68                 | Clinical        | 4.411                                     | 2010                | M                  | 1                                   | 2                                        | 0                        | 0                          |
| 12      | 307                       | 70                 | Clinical        | 4.169                                     | 2021                | F                  | 3                                   | 1                                        | 0                        | 0                          |
| 13      | 292                       | 216                | Clinical        | 13.116                                    | 2014                | M                  | 1                                   | 2                                        | 1                        | 0                          |
| 14      | 288                       | 6                  | Pharmacological | 7.051                                     | 2021                | M                  | 2                                   | 4                                        | 1                        | 0                          |
| 15      | 285                       | 2                  | Clinical        | 4.997                                     | 2021                | M                  | 4                                   | 4                                        | 1                        | 0                          |
| 16      | 276                       | 28                 | Clinical        | 11.816                                    | 2021                | M                  | 2                                   | 1                                        | 0                        | 1                          |
| 17      | 269                       | 76                 | Clinical        | 33.801                                    | 2021                | F                  | 3                                   | 4                                        | 0                        | 0                          |
| 18      | 264                       | 19                 | Clinical        | 3.508                                     | 2021                | M                  | 4                                   | 4                                        | 1                        | 0                          |
| 19      | 257                       | 9                  | Pharmacological | NI                                        | 2015                | M                  | 4                                   | 4                                        | 0                        | 0                          |
| 20      | 243                       | 19                 | Pharmacological | 3.526                                     | 2018                | M                  | 1                                   | 1                                        | 0                        | 0                          |
| 21      | 180                       | 13                 | Clinical        | 4.781                                     | 2021                | M                  | 2                                   | 2                                        | 0                        | 0                          |
| 22      | 167                       | 2                  | Pharmacological | 2.870                                     | 2018                | F                  | 4                                   | 1                                        | 0                        | 0                          |

|    |     |     |                 |        |      |   |   |   |   |   |
|----|-----|-----|-----------------|--------|------|---|---|---|---|---|
| 23 | 158 | 2   | Clinical        | 4.997  | 2021 | M | 2 | 2 | 0 | 0 |
| 24 | 142 | 52  | Clinical        | 20.589 | 2019 | M | 2 | 4 | 1 | 0 |
| 25 | 130 | 160 | Clinical        | 31.777 | 2020 | M | 1 | 4 | 1 | 0 |
| 26 | 129 | 253 | Clinical        | 35.386 | 2018 | M | 1 | 3 | 1 | 0 |
| 27 | 125 | 44  | Clinical        | 2.145  | 2021 | M | 1 | 1 | 1 | 1 |
| 28 | 116 | 41  | Clinical        | 16.102 | 2019 | M | 4 | 4 | 1 | 0 |
| 29 | 101 | 42  | Clinical        | 17.659 | 2020 | M | 1 | 3 | 1 | 0 |
| 30 | 100 | 30  | Pharmacological | 5.606  | 2020 | M | 2 | 2 | 1 | 0 |

**Supplementary Table 2.** Characteristics of source articles according to level of causal statements in titles.

|                                            | Appropriate interpretation (n=11) | Ambiguous interpretation (n=8) | Conditionally causal (n=3) | Unconditionally causal (n=8) | Test p-value  |
|--------------------------------------------|-----------------------------------|--------------------------------|----------------------------|------------------------------|---------------|
| Number of citations per year               | 17.00 (8.54- 23.00)               | 5.75 (2.88- 10.75)             | 35.00 (20.00- 36.50)       | 3.67 (1.50- 8.21)            | <b>0.0466</b> |
| Journal Impact factor                      | 13.10 (3.95- 24.75)               | 6.25 (4.95- 8.27)              | 5.40 (4.80- 19.60)         | 3.95 (3.05- 4.85)            | 0.119         |
| Altmetric Attention Score                  | 292.00 (129.50- 410.50)           | 228.00 (154.00- 298.25)        | 307.00 (288.00- 321.50)    | 215.50 (128.75- 279.75)      | 0.274         |
| Years since publication                    | 3.00 (2.00- 6.00)                 | 2.00 (2.00- 3.00)              | 2.00 (2.00- 3.00)          | 3.50 (2.25- 4.75)            | 0.957         |
| Last author gender (Female/Male)           | 0%/100%                           | 0%/100%                        | 100%/0%                    | 12.5%/87.5%                  | <b>0.000</b>  |
| Type of journal (Clinical/pharmacological) | 72.7%/27.3%                       | 62.5/37.5%                     | 100%/0%                    | 62.5/37.5%                   | 0.837         |

\*Fisher exact test for categorical variables and Anova test for continuous variables

**Supplementary Table 3.** Results of the multinomial model exploring the association between the level of causal statements in citations (dependent variable) and the level of causal statements in abstract conclusions of source articles.

| Causal claims in citations | Variable    | Contrast   | Estimate | Standard Error | Odds Ratio | Lower 95% CI | Upper 95% CI | z    | p-values           |
|----------------------------|-------------|------------|----------|----------------|------------|--------------|--------------|------|--------------------|
| <b>Level 2 -1</b>          | (Intercept) |            | -0.24    | 0.16           |            |              |              |      |                    |
|                            | Conclusion  | Level 2 -1 | 0.62     | 0.30           | 1.86       | 1.03         | 3.34         | 2.06 | <b>0.04</b>        |
|                            | Conclusion  | Level 3 -1 | 0.43     | 0.55           | 1.54       | 0.52         | 4.55         | 0.78 | 0.43               |
|                            | Conclusion  | Level 4 -1 | 0.25     | 0.30           | 1.28       | 0.71         | 2.32         | 0.82 | 0.41               |
| <b>Level 3 -1</b>          | (Intercept) |            | -1.05    | 0.20           |            |              |              |      |                    |
|                            | Conclusion  | Level 2 -1 | 1.66     | 0.41           | 5.27       | 2.37         | 11.72        | 4.08 | <b>0.00</b>        |
|                            | Conclusion  | Level 3 -1 | 1.44     | 0.66           | 4.21       | 1.16         | 15.19        | 2.19 | <b>0.03</b>        |
|                            | Conclusion  | Level 4 -1 | 0.32     | 0.49           | 1.38       | 0.53         | 3.58         | 0.65 | 0.51               |
| <b>Level 4 -1</b>          | (Intercept) |            | 0.77     | 0.13           |            |              |              |      |                    |
|                            | Conclusion  | Level 2 -1 | 0.99     | 0.27           | 2.69       | 1.59         | 4.56         | 3.68 | <b>0.00</b>        |
|                            | Conclusion  | Level 3 -1 | 2.05     | 0.42           | 7.74       | 3.38         | 17.71        | 4.84 | <b>&lt; .00001</b> |
|                            | Conclusion  | Level 4 -1 | 1.21     | 0.25           | 3.36       | 2.05         | 5.51         | 4.81 | <b>&lt; .00001</b> |

**Supplementary Table 4.** Results of the multinomial model exploring the association between the level of causal statements in citations (dependent variable) and the level of causal statements in titles of source articles.

| Causal claims in citations | Variable    | Contrast   | Estimate | Standard Error | Odds Ratio | Lower 95% CI | Upper 95% CI | z     | p-values    |
|----------------------------|-------------|------------|----------|----------------|------------|--------------|--------------|-------|-------------|
| Level 2 -1                 | (Intercept) |            | -0.32    | 0.14           |            |              |              |       |             |
|                            | Title       | Level 2 -1 | -0.02    | 0.38           | 0.98       | 0.47         | 2.06         | -0.04 | 0.97        |
|                            | Title       | Level 3 -1 | -0.51    | 0.32           | 0.60       | 0.32         | 1.12         | -1.61 | 0.11        |
|                            | Title       | Level 4 -1 | 0.08     | 0.34           | 1.08       | 0.56         | 2.10         | 0.23  | 0.82        |
| Level 3 -1                 | (Intercept) |            | -1.29    | 0.21           |            |              |              |       |             |
|                            | Title       | Level 2 -1 | 0.19     | 0.44           | 1.21       | 0.51         | 2.88         | 0.43  | 0.67        |
|                            | Title       | Level 3 -1 | -1.78    | 0.63           | 0.17       | 0.05         | 0.59         | -2.81 | <b>0.01</b> |
|                            | Title       | Level 4 -1 | -0.03    | 0.43           | 0.97       | 0.42         | 2.25         | -0.08 | 0.94        |
| Level 4 -1                 | (Intercept) |            | 0.52     | 0.11           |            |              |              |       |             |
|                            | Title       | Level 2 -1 | 0.12     | 0.30           | 1.13       | 0.62         | 2.04         | 0.39  | 0.70        |
|                            | Title       | Level 3 -1 | -0.90    | 0.27           | 0.41       | 0.24         | 0.69         | -3.35 | <b>0.00</b> |
|                            | Title       | Level 4 -1 | 0.10     | 0.28           | 1.10       | 0.64         | 1.90         | 0.34  | 0.73        |
